# Supplementary material
Source: publisher site journal article supplement (https://www.spandidos-publications.com/5807/downloadSupplementary)
Supplement: Supplementary file 1 [file downloadSupplementary]

Table S1. Primers used in the reverse transcription-quantitative PCR.

| Gene    | Primer | Sequence (5'→3')        | Product size, bp |
|---------|--------|-------------------------|------------------|
| CFH     | F      | GCTGTATGCACTGAATCTGGA   | 136              |
|         | R      | ACTGGTACGTGATTTTCATCTCC |                  |
| CD24    | F      | CCAAATCCAATAATGCCACC    | 123              |
|         | R      | ACGTTTCTTGGCCTGAGTC     |                  |
| CD44    | F      | ACACGAAGGAAAGCAGGAC     | 135              |
|         | R      | GGTGAATGTGTCTTGGTCTC    |                  |
| CD133   | F      | TTATCTGCAGTGGATCGAGTTC  | 150              |
|         | R      | GTAGCTTTTCCTATGCCAAACC  |                  |
| Oct4    | F      | GAGAATTTGTTCTGCAGTGC    | 150              |
|         | R      | TCGTTGTGCATAGTCGCTG     |                  |
| Sox2    | F      | AAAACGAGGGAAATGGGAGG    | 142              |
|         | R      | GGGATTGGTGTCTCTTTTGC    |                  |
| c-Myc   | F      | TTCGGGTAGTGAAAACCAG     | 108              |
|         | R      | AGTAGAAATACGGCTGCACC    |                  |
| Klf4    | F      | ACCTACACAAAGAGTCCCATC   | 136              |
|         | R      | TGTGTTTACGGTAGTGCCTG    |                  |
| EpCAM   | F      | CAGACAAGGACACTGAAATAACC | 134              |
|         | R      | TGTGATCTCCTTCTGAAGTGC   |                  |
| ALDH1A3 | F      | CTTCTGCCTTAGAGTCTGGAAC  | 138              |
|         | R      | TCACTTCTGTGTATTCGGCC    |                  |
| ABCG2   | F      | AGGTCTGTTGGTCAATCTCAC   | 142              |
|         | R      | TCCTGTTGCATTGAGTCTG     |                  |
| Nanog   | F      | GAAATACCTCAGCCTCCAGC    | 149              |
|         | R      | GCGTCACACCATTGCTATTC    |                  |
| GJA1    | F      | GGATCGGGTTAAGGGAAAGAG   | 139              |
|         | R      | AGGAGACATAGGCGAGAGG     |                  |
| EPAS1   | F      | CCCATGTCTCCACCTTCAAG    | 136              |
|         | R      | AAGGCTTGCTCTTCATACTCC   |                  |
| CDKN1B  | F      | GGTGGACCCAAAGACTGATC    | 146              |
|         | R      | GGGAACCGTCTGAAACATTTTC  |                  |
| CXCR4   | F      | GTCCATTCCTTTGCCTCTTTTG  | 105              |
|         | R      | TCTTACGGAACAGGGTTC      |                  |
| PTPRJ   | F      | CAAGCAGGCTCAGGACTATG    | 142              |
|         | R      | GGAGGTGAAATGGAAGTGTCT   |                  |
| MYO6    | F      | ACGTGCTCCAAAGTCTGTTAC   | 112              |
|         | R      | GTTCATTTCAATCTCCCGCTG   |                  |
| EPB41L3 | F      | TCAACAGACACTGCCGTAAC    | 147              |
|         | R      | ATCCATGAGCTTTTCCCCAG    |                  |
| β-actin | F      | CCCAGACAATGAAGATCAAG    | 136              |
|         | R      | GACTCGTCATACTCCTGCTTG   |                  |

ABCG2, ATP binding cassette subfamily G member 2; ALDH1A3, aldehyde dehydrogenase 1 family member A3; CFH, complement factor H; CXCR4, C-X-C motif chemokine receptor 4; EPAS1, endothelial PAS domain protein 1; EpCAM, epithelial cellular adhesion molecule; EPB41L3, erythrocyte membrane protein band 4.1-like 3; GJA1, gap junction protein  $\alpha$ 1; Klf4, Klf transcription factor 4; MYO6, myosin VI; PTPRJ, protein tyrosine phosphatase receptor type J.

Table SII. shRNA used for CFH<sup>a</sup> knockdown.

| shRNA    | Plasmid name or TRC clone ID | Target sequence (5'→3') |
|----------|------------------------------|-------------------------|
| shRNA NS | p.LKO.1 TRC control          | CCGCAGGTATGCACGCGT      |
| shCFH #1 | TRCN0000057133               | CGCAAGAAAGACCAGTATAAA   |
| shCFH #5 | TRCN0000377700               | TTATGCACATGGGACTAAATT   |

<sup>a</sup>Gene symbol, *CFH*; reference sequence, NM\_00186; species, human; region, coding sequence. CFH, complement factor H; NS, non-silencing; shRNA, short hairpin RNA.

Table III. Antibodies used for western blotting.

| Antibody                                                | Host   | Dilution | Supplier                                    | Cat. no.  |
|---------------------------------------------------------|--------|----------|---------------------------------------------|-----------|
| CFH                                                     | Mouse  | 1:1,000  | Invitrogen (Thermo Fisher Scientific, Inc.) | MA1-70057 |
| CD24                                                    | Rabbit | 1:1,000  | Santa Cruz Biotechnology, Inc.              | sc-11406  |
| CD44                                                    | Rabbit | 1:1,000  | Abcam                                       | ab157107  |
| CD133                                                   | Rabbit | 1:1,000  | Abcam                                       | ab19898   |
| Oct4                                                    | Mouse  | 1:1,000  | Santa Cruz Biotechnology, Inc.              | sc-5279   |
| Sox2                                                    | Rabbit | 1:1,000  | Invitrogen (Thermo Fisher Scientific, Inc.) | 48-1400   |
| c-Myc                                                   | Rabbit | 1:1,000  | Abcam                                       | ab32072   |
| Klf4                                                    | Rabbit | 1:1,000  | Abcam                                       | ab106629  |
| EpCAM                                                   | Mouse  | 1:1,000  | Santa Cruz Biotechnology, Inc.              | sc-25308  |
| CXCR4                                                   | Mouse  | 1:1,000  | Invitrogen (Thermo Fisher Scientific, Inc.) | 35-8800   |
| p-JAK1                                                  | Rabbit | 1:1,000  | Cell signaling Technology, Inc.             | 3331S     |
| JAK1                                                    | Rabbit | 1:1,000  | Cell signaling Technology, Inc.             | 3344P     |
| p-JAK2                                                  | Rabbit | 1:1,000  | Cell signaling Technology, Inc.             | 3776S     |
| JAK2                                                    | Rabbit | 1:1,000  | Cell signaling Technology, Inc.             | 3230S     |
| p-STAT3                                                 | Rabbit | 1:1,000  | Cell signaling Technology, Inc.             | 9145S     |
| STAT3                                                   | Mouse  | 1:1,000  | Cell signaling Technology, Inc.             | 9139S     |
| EPB41L3                                                 | Rabbit | 1:1,000  | Abcam                                       | ab154071  |
| p-ERK                                                   | Rabbit | 1:1,000  | Cell signaling Technology, Inc.             | 4370S     |
| ERK                                                     | Rabbit | 1:1,000  | Cell signaling Technology, Inc.             | 4695T     |
| p-JNK                                                   | Mouse  | 1:1,000  | Cell signaling Technology, Inc.             | 9255S     |
| JNK                                                     | Rabbit | 1:1,000  | Cell signaling Technology, Inc.             | 9252T     |
| p-p38                                                   | Rabbit | 1:1,000  | Cell signaling Technology, Inc.             | 9215S     |
| p38                                                     | Rabbit | 1:1,000  | Cell signaling Technology, Inc.             | 8690T     |
| p-AKT                                                   | Rabbit | 1:1,000  | Cell signaling Technology, Inc.             | 4060      |
| AKT                                                     | Rabbit | 1:1,000  | Abcam                                       | ab126811  |
| $\beta$ -actin                                          | Mouse  | 1:1,000  | Santa Cruz Biotechnology, Inc.              | sc-47778  |
| Mouse IgG (H+L) secondary antibody conjugated with HRP  | Goat   | 1:5,000  | Invitrogen (Thermo Fisher Scientific, Inc.) | G21040    |
| Rabbit IgG (H+L) secondary antibody conjugated with HRP | Goat   | 1:5,000  | Invitrogen (Thermo Fisher Scientific, Inc.) | G21234    |

CFH, complement factor H; CXCR4, C-X-C motif chemokine receptor 4; EpCAM, epithelial cellular adhesion molecule; EPB41L3, erythrocyte membrane protein band 4.1-like 3; JAK, Janus kinase; Klf4, Klf transcription factor 4.

Table SIV. siRNAs used for EPB41L3 knockdown.

| siRNA            | Design ID          | Duplex sequences (5'→3')                                                                                   | Location/<br>Exon |
|------------------|--------------------|------------------------------------------------------------------------------------------------------------|-------------------|
| Negative control | 51-01-14-04        | rCrGrUrUrArArUrCrGrCrGrUrArUrArArUrArCrGrCrGrUAT<br>rArUrArCrGrCrGrUrArUrUrArUrArCrGrCrGrArUrUrArArCrGrArC | -                 |
| siEPB41L3 #1     | hs.Ri.EPB41L3.13.1 | rGrCrArUrGrArArGrCrArArCrGrArUrArArArUrUrArCAA<br>rUrUrGrUrArArUrUrUrUrArUrCrGrUrUrGrCrUrCrArUrGrCrArU     | 3'UTR<br>/20-23   |
| siEPB41L3 #2     | hs.Ri.EPB41L3.13.2 | rUrGrArUrArCrUrUrCrUrCrGrArUrGrGrArUrCrArGrArATA<br>rUrArUrUrCrUrGrArUrCrCrArUrCrGrArGrArArGrUrArUrCrArCrU | CDS<br>/3, 5      |
| siEPB41L3 #3     | hs.Ri.EPB41L3.13.3 | rArCrArCrUrUrGrArArCrUrUrGrCrUrArGrArGrArArGAC<br>rGrUrCrUrUrCrUrCrUrArGrCrArArGrUrUrCrArArGrUrGrUrUrC     | CDS<br>/4, 6      |

CDS, coding sequence; EPB41L3, erythrocyte membrane protein band 4.1-like 3; si(RNA), small interfering (RNA); UTR, untranslated region.

Table SV. Biological processes involving upregulated genes following complement factor H downregulation, based on the TOPPFUN database results.

| Term                             | Count | Genes                                                                                                                                                                                                                                                                                                                                                                                                                                                                                                  |
|----------------------------------|-------|--------------------------------------------------------------------------------------------------------------------------------------------------------------------------------------------------------------------------------------------------------------------------------------------------------------------------------------------------------------------------------------------------------------------------------------------------------------------------------------------------------|
| Anatomical Structure Development | 69    | SPRY1, EREG, SHB, ID1, LAMA5, ZMIZ1, EYA1, CREB3L1, EDNRA, AREG, B4GALT1, TGFA, RHOB, LIF, TGM2, CSF1, PTPRJ, JAG1, PLAU, TNFRSF1A, PBX1, MIR27B, SDC4, EPAS1, SMAD3, VEGFA, SEMA3C, SHROOM2, ITGB4, STC1, TENM3, FST, MMP16, SCARA3, PLXNA1, LAMA4, CDKN1B, MIR548C, VLDLR, DDIT4, DPYSL2, NTF3, EPB41L3, PRAG1, TNFRSF21, PHGDH, PARD6B, NPTN, SEMA3D, EFNA4, FGF13, SDC2, CDH11, CDK6, F2RL1, CLDN1, RHOF, IFITM1, CRISPLD2, S100A4, SEC24D, TNFSF18, ADD2, FLG, KRT81, KRT80, ZNF430, TIMP4, INHBB |
| Cellular Component Organization  | 60    | LAMA5, EPB41L3, SHROOM2, F2RL1, ITGB4, CLDN1, PARD6B, PTPRJ, CDH11, SDC4, SMAD3, VEGFA, CRISPLD2, VLDLR, ABCA1, LAMA4, CREB3L1, B4GALT1, LIPG, TNFRSF1A, MMP16, SCARA3, MIR27B, DPYSL2, F2RL3, NTF3, AREG, TGFA, SEC24D, STXBP6, BST2, VPS35L, RAB39A, PLAU, PCDH7, RHOF, METTL7A, RAB27B, SEMA3C, ID1, PRAG1, TNFRSF21, PHGDH, LIF, NPTN, SEMA3D, EFNA4, TENM3, FGF13, SDC2, PLXNA1, ADD2, RHOB, CDKN1B, FLG, SPRY1, EYA1, MYBL2, EREG, DDIT4                                                         |
| Regulation of localization       | 60    | CDKN1B, SEMA3C, EREG, TNFSF18, NTF3, LAMA4, IFITM1, LAMA5, F2RL1, PRAG1, EDNRA, B4GALT1, STC1, RHOB, PARD6B, SEMA3D, CSF1, PTPRJ, BST2, JAG1, PLAU, FGF13, RHOF, MIR27B, CD99L2, SDC4, PLXNA1, SMAD3, CDK6, VEGFA, DDIT4, ID1, SHROOM2, ITGB4, ADD2, PLAT, SDC2, CRISPLD2, DPYSL2, ABCA1, INHBB, NLRP2, TNFRSF21, CREB3L1, LIF, STXBP6, VPS35L, TNFRSF1A, PCDH7, METTL7A, RAB27B, RAB39A, F2RL3, LIPG, VLDLR, AREG, TGFA, SEC24D, SCARA3, CLDN1                                                        |
| Cell differentiation             | 57    | VLDLR, DDIT4, SEMA3C, DPYSL2, NTF3, ID1, EYA1, EPB41L3, PRAG1, TNFRSF21, PHGDH, AREG, PARD6B, LIF, NPTN, SEMA3D, EFNA4, CSF1, TENM3, JAG1, FGF13, PBX1, SDC2, CDH11, SDC4, PLXNA1, CDK6, VEGFA, LAMA5, F2RL1, CLDN1, STC1, TNFRSF1A, CDKN1B, FLG, EREG, KRT81, KRT80, B4GALT1, SMAD3, ABCA1, TNFSF18, SHB, FST, MIR27B, SPRY1, EDNRA, S100A4, IFITM1, CREB3L1, ITGB4, PTPRJ, ZMIZ1, EPAS1, INHBB, LAMA4, CABYR                                                                                         |
| Response to stimulus             | 57    | SEMA3C, TNFSF18, NTF3, F2RL1, EDNRA, SEMA3D, CSF1, PTPRJ, SMAD3, VEGFA, VLDLR, DPYSL2, NPTN, EFNA4, PLAU, PLXNA1, CDKN1B, SPRY1, DDIT4, EREG, EYA1, CREB3L1, AREG, TGFA, LIF, IGFBP4, BST2, JAG1, PLAT, TNFRSF1A, FST, CDK6, STC1, EPAS1, TGM2, SCARA3, PTGES, IFITM1, LAMA5, TNFRSF21, CLDN1, LAPTM5, TIMP4, MYBL2, INHBB, F2RL3, ITGB4, B4GALT1, SDC4, PDGFRL, ID1, MIR27B, ABCA1, NLRP2, GRPR, SLFN13, RHOB                                                                                         |
| Regulation of biological process | 54    | ID1, IFITM1, CREB3L1, AREG, CSF1, JAG1, PBX1, SMAD3, CDK6, VEGFA, CDKN1B, SEMA3C, ABCA1, EREG, TNFSF18, SHB, PRAG1, TNFRSF21, LIF, SEMA3D, FGF13, FST, MIR27B, NTF3, SHROOM2, F2RL1, ADD2, STC1, RHOB, BST2, RHOF, SDC4, VLDLR, INHBB, EDNRA, TGFA, NPTN, IGFBP4, PTPRJ, TNFRSF1A, PLAU, CD99L2, SPRY1, DDIT4, PDK4, ZMIZ1, B4GALT1, MIR548C, TENM3, PLXNA1, TGM2, PLAT, SCARA3, STXBP6                                                                                                                |
| Signal transduction              | 53    | SPRY1, DDIT4, EREG, PDGFRL, INHBB, NTF3, PDK4, SHB, ID1, CREB3L1, AREG, TGFA, LIF, NPTN, EFNA4, CSF1, IGFBP4, PTPRJ, PLAT, FST, SDC2, SMAD3, VEGFA, TNFSF18, F2RL3, ZMIZ1, EYA1, F2RL1, PRAG1, EDNRA, S100A4, TGM2, BST2, JAG1, TNFRSF1A, MIR27B, CDKN1B, TIMP4, PBX1, CDK6, GUCY1B1, ABCA1, RHOB, RAB39A, RHOF, RAB27B, FGF13,                                                                                                                                                                        |

|                                 |    |  |                                                                                                                                                                                                                                                                                                                                                       |
|---------------------------------|----|--|-------------------------------------------------------------------------------------------------------------------------------------------------------------------------------------------------------------------------------------------------------------------------------------------------------------------------------------------------------|
|                                 |    |  | GRPR, SEMA3C, SEMA3D, PLXNA1, CABYR, PLAU                                                                                                                                                                                                                                                                                                             |
| Biological regulation           | 50 |  | CDKN1B, SEMA3C, TNFSF18, INHBB, SHB, ID1, LAMA4, F2RL1, PRAG1, TNFRSF21, CREB3L1, AREG, STC1, LIF, NPTN, SEMA3D, BST2, JAG1, PLAT, PLAU, FGF13, TNFRSF1A, PBX1, MIR27B, SMAD3, CDK6, VEGFA, EREG, NTF3, TGFA, PTPRJ, VLDLR, EDNRA, CSF1, IGFBP4, SDC4, SPRY1, DDIT4, PDK4, F2RL3, GRPR, TGM2, IFITM1, RHOB, ABCA1, LIPG, NLRP2, DPYSL2, SHROOM2, ADD2 |
| Cell proliferation              | 37 |  | CDKN1B, SPRY1, EREG, TNFSF18, NTF3, PTGES, ID1, IFITM1, LAMA5, ZMIZ1, EYA1, TNFRSF21, GRPR, EDNRA, AREG, B4GALT1, TGFA, MIR548C, LIF, TGM2, CSF1, PTPRJ, BST2, JAG1, PLAU, PBX1, MIR27B, SDC4, SMAD3, CDK6, VEGFA, IGFBP4, FST, SHB, F2RL1, STC1, MMP16                                                                                               |
| Cell migration                  | 34 |  | DDIT4, SEMA3C, TNFSF18, NTF3, ID1, LAMA4, IFITM1, LAMA5, SHROOM2, F2RL1, PRAG1, ITGB4, EDNRA, ADD2, B4GALT1, STC1, RHOB, PARD6B, SEMA3D, CSF1, PTPRJ, BST2, JAG1, PLAT, PLAU, FGF13, RHOF, MIR27B, CD99L2, SDC2, SDC4, PLXNA1, SMAD3, VEGFA                                                                                                           |
| Cell development                | 33 |  | VLDLR, SEMA3C, DPYSL2, NTF3, SHB, ID1, EYA1, PRAG1, TNFRSF21, LIF, NPTN, SEMA3D, CSF1, TENM3, JAG1, FGF13, TNFRSF1A, PBX1, SDC2, PLXNA1, VEGFA, F2RL1, CLDN1, STC1, B4GALT1, CDK6, PARD6B, EFNA4, CDH11, LAMA5, EDNRA, EREG, INHBB                                                                                                                    |
| Immune system process           | 32 |  | TNFSF18, SHB, ZMIZ1, F2RL1, ADD2, LIF, EFNA4, CSF1, PTPRJ, JAG1, PBX1, FST, EPAS1, SMAD3, CDK6, VEGFA, CRISPLD2, TNFRSF21, B4GALT1, BST2, VPS35L, PLAU, RHOF, METTL7A, SDC4, DDIT4, IFITM1, SLFN13, SCARA3, EREG, EDNRA, CD99L2                                                                                                                       |
| Response to stress              | 31 |  | CDKN1B, VLDLR, DDIT4, EDNRA, STC1, PLAT, PLAU, EPAS1, SMAD3, VEGFA, F2RL1, PTPRJ, EREG, TNFSF18, INHBB, PTGES, IFITM1, NLRP2, CLDN1, B4GALT1, TGM2, CSF1, IGFBP4, SLFN13, BST2, TNFRSF1A, ANKFN1, SCARA3, KLRC3, F2RL3, SDC4                                                                                                                          |
| Biological adhesion             | 30 |  | TNFSF18, INHBB, SHB, ID1, LAMA4, LAMA5, ZMIZ1, TNFRSF21, ITGB4, CLDN1, ADD2, B4GALT1, RHOB, NPTN, TGM2, CSF1, TENM3, PTPRJ, STXBP6, JAG1, PLAU, PCDH7, MIR27B, CD99L2, CDH11, SDC4, PLXNA1, SMAD3, CDK6, VEGFA                                                                                                                                        |
| Tissue development              | 30 |  | CDKN1B, FLG, SPRY1, SEMA3C, EREG, KRT81, ID1, LAMA5, EYA1, F2RL1, PHGDH, CLDN1, EDNRA, AREG, KRT80, B4GALT1, STC1, RHOB, LIF, TGM2, CSF1, JAG1, TNFRSF1A, PBX1, FST, SDC4, PLXNA1, SMAD3, CDK6, VEGFA                                                                                                                                                 |
| Tube development                | 30 |  | CRISPLD2, SPRY1, SEMA3C, EREG, SHB, ID1, LAMA5, ZMIZ1, EYA1, ITGB4, CREB3L1, PHGDH, EDNRA, AREG, B4GALT1, TGFA, RHOB, LIF, TGM2, CSF1, PTPRJ, JAG1, PLAU, TNFRSF1A, PBX1, MIR27B, SDC4, EPAS1, SMAD3, VEGFA                                                                                                                                           |
| Cell adhesion                   | 29 |  | TNFSF18, SHB, ID1, LAMA4, LAMA5, ZMIZ1, TNFRSF21, ITGB4, CLDN1, ADD2, B4GALT1, RHOB, NPTN, TGM2, CSF1, TENM3, PTPRJ, STXBP6, JAG1, PLAU, PCDH7, MIR27B, CD99L2, CDH11, SDC4, PLXNA1, SMAD3, CDK6, VEGFA                                                                                                                                               |
| Regulation of metabolic process | 28 |  | CDKN1B, VLDLR, EREG, TNFSF18, INHBB, NTF3, F2RL1, NLRP2, EDNRA, AREG, TGFA, LIF, NPTN, CSF1, IGFBP4, PTPRJ, FGF13, TNFRSF1A, MIR27B, SDC4, SMAD3, VEGFA, SPRY1, DDIT4, SHB, TIMP4, BST2, PLAT                                                                                                                                                         |
| Regulation of cell death        | 22 |  | B4GALT1, TNFRSF1A, DDIT4, NTF3, TNFRSF21, CSF1, PLAU, MYBL2, VEGFA, CDKN1B, TNFSF18, INHBB, PDK4, ID1, EYA1, NLRP2, CREB3L1, EDNRA, TGFA, RHOB, TGM2, SMAD3                                                                                                                                                                                           |

|                                  |    |                                                                                                                                                        |
|----------------------------------|----|--------------------------------------------------------------------------------------------------------------------------------------------------------|
| Growth                           | 21 | CDKN1B, SPRY1, SEMA3C, DPYSL2, EREG, ZMIZ1, EPB41L3, AREG, STC1, MIR548C, SEMA3D, CSF1, IGFBP4, PTPRJ, BST2, PLAU, FGF13, SCARA3, PLXNA1, SMAD3, VEGFA |
| Homeostatic process              | 21 | ABCA1, LIPG, FLG, PDK4, ZG16B, ID1, LAMA4, CLDN1, CSF1, EPAS1, VEGFA, F2RL3, F2RL1, EDNRA, STC1, NPTN, TGM2, RAB39A, MIR27B, SMAD3, LIP                |
| Protein modification process     | 20 | CDKN1B, VLDLR, EREG, TNFSF18, INHBB, NTF3, F2RL1, EDNRA, AREG, TGFA, LIF, NPTN, CSF1, IGFBP4, PTPRJ, FGF13, TNFRSF1A, MIR27B, SDC4, VEGFA              |
| Reproduction                     | 20 | INHBB, PLAT, PLAU, EREG, CDKN1B, SHB, B4GALT1, LIF, ZMIZ1, ITGB4, EDNRA, AREG, STC1, CABYR, CSF1, TIMP4, PBX1, FST, EPAS1, VEGFA                       |
| Cell activation                  | 18 | CRISPLD2, TNFSF18, F2RL3, SHB, ZMIZ1, F2RL1, TNFRSF21, B4GALT1, CSF1, PTPRJ, BST2, VPS35L, PLAU, RHOF, METTL7A, SDC4, SMAD3, CDK6                      |
| Gene expression                  | 18 | TNFSF18, ID1, F2RL1, NLRP2, S100A4, TGM2, BST2, TNFRSF1A, PBX1, MIR27B, SMAD3, VEGFA, ABCA1, EREG, INHBB, TNFRSF21, NPTN, PTPRJ                        |
| Developmental growth             | 17 | CDKN1B, SPRY1, SEMA3C, DPYSL2, EREG, ZMIZ1, AREG, STC1, MIR548C, SEMA3D, CSF1, PLAU, FGF13, SCARA3, PLXNA1, SMAD3, VEGFA                               |
| Cellular process                 | 16 | NTF3, ID1, EPB41L3, SHROOM2, F2RL1, ADD2, STC1, RHOB, BST2, FGF13, RHOF, SDC4, SMAD3, SPRY1, EYA1, PARD6B                                              |
| Embryo development               | 16 | SEMA3C, ZMIZ1, EYA1, PHGDH, EDNRA, LIF, SEC24D, PBX1, MMP16, SDC4, EPAS1, SMAD3, VEGFA, LAMA4, LAMA5, ITGB4                                            |
| Protein metabolic process        | 16 | EREG, TNFSF18, PDGFRL, NTF3, EDNRA, AREG, TGFA, LIF, EFNA4, PTPRJ, TNFRSF1A, VEGFA, DDIT4, ZMIZ1, EYA1, TGM2                                           |
| Hemopoiesis                      | 15 | TNFSF18, SHB, ZMIZ1, F2RL1, ADD2, LIF, EFNA4, CSF1, PTPRJ, JAG1, PBX1, FST, EPAS1, CDK6, VEGFA                                                         |
| Developmental process            | 14 | CDKN1B, EREG, INHBB, SHB, AREG, B4GALT1, STC1, LIF, CABYR, CSF1, PBX1, FST, EPAS1, VEGFA                                                               |
| Multicellular organismal process | 13 | ID1, IFITM1, CREB3L1, AREG, STC1, CSF1, JAG1, PBX1, MMP16, CDH11, SMAD3, CDK6, VEGFA                                                                   |
| Cell growth                      | 12 | CDKN1B, SEMA3C, DPYSL2, EPB41L3, SEMA3D, IGFBP4, PTPRJ, BST2, FGF13, PLXNA1, SMAD3, VEGFA                                                              |
| Tissue remodeling                | 9  | SEMA3C, LIF, TGM2, JAG1, EPAS1, VEGFA, PDK4, B4GALT1, EFNA4                                                                                            |
| Granulocyte migration            | 6  | TNFSF18, EDNRA, CSF1, PTPRJ, CD99L2, VEGFA                                                                                                             |
| System process                   | 1  | STC1                                                                                                                                                   |

Table SVI. Biological processes involving downregulated genes following complement factor H downregulation, based on the DAVID database results.

| Term                             | Count | Genes                           |
|----------------------------------|-------|---------------------------------|
| Anatomical structure development | 3     | LOX, MYH10, ADAMTS6             |
| Cell death                       | 3     | DAPK1, NLRP3, PMAIP1            |
| Cell proliferation               | 2     | GJA1, NOG                       |
| Gene expression                  | 5     | RIMS1, GJA1, HMGN5, NOG, PTPN22 |
| Response to stimuli              | 3     | EGR1, GJA1, CTSV                |

Table SVII. Diseases involving upregulated genes following complement factor H downregulation, based on the TOPPFUN database results.

| Disease name                                                            | Count | Genes                                                                                                                                                                   |
|-------------------------------------------------------------------------|-------|-------------------------------------------------------------------------------------------------------------------------------------------------------------------------|
| Triple-negative breast carcinoma                                        | 27    | CDKN1B,AFAP1-AS1,SPRY1,ABCA1,EREG,NTF3,LAMA4,F2RL1,ITGB4,GRPR,CREB3L1,PHGDH,CLDN1,EDNRA,TGFA,S100A4,EFNA4,LIPG,JAG1,TNFRSF1A,MIR27B,CDH11,PLXNA1,EPAS1,SMAD3,CDK6,VEGFA |
| Triple negative breast neoplasms                                        | 27    | CDKN1B,AFAP1-AS1,SPRY1,ABCA1,EREG,NTF3,LAMA4,F2RL1,ITGB4,GRPR,CREB3L1,PHGDH,CLDN1,EDNRA,TGFA,S100A4,EFNA4,LIPG,JAG1,TNFRSF1A,MIR27B,CDH11,PLXNA1,EPAS1,SMAD3,CDK6,VEGFA |
| Tumor angiogenesis                                                      | 22    | VLDLR,ID1,LAMA4,LAMA5,EYA1,EDNRA,AREG,STC1,TGFA,S100A4,SEMA3D,CSF1,JAG1,PLAT,PLAU,FGF13,FST,PLXNA1,EPAS1,SMAD3,CDK6,VEGFA                                               |
| Carcinoma breast stage IV                                               | 18    | ACTBL2,ID1,F2RL1,GRPR,CREB3L1,S100A4,RHOB,BST2,PLAT,PLAU,TNFRSF1A,FST,PCDH7,CDH11,EPAS1,SMAD3,CDK6,VEGFA                                                                |
| Malignant neoplasm of breast                                            | 14    | CDKN1B,EREG,RIBC2,ZMIZ1,EPB41L3,SHROOM2,PHGDH,CLDN1,EDNRA,AREG,TGM2,CSF1,JAG1,FST                                                                                       |
| Estrogen receptor-negative breast cancer                                | 10    | INHBB,FAM102A,AREG,JAG1,PLAT,PBX1,SDC2,RAB27B,EPAS1,VEGFA                                                                                                               |
| Invasive carcinoma of breast                                            | 10    | CDKN1B,CLDN1,AREG,TGFA,S100A4,BST2,PLAU,FST,CDK6,VEGFA                                                                                                                  |
| Mammary carcinoma, human                                                | 10    | CDKN1B,RIBC2,EPB41L3,PHGDH,CLDN1,AREG,TGM2,CSF1,JAG1,FST                                                                                                                |
| Mammary neoplasms, human                                                | 10    | CDKN1B,RIBC2,EPB41L3,PHGDH,CLDN1,AREG,TGM2,CSF1,JAG1,FST                                                                                                                |
| Breast carcinoma                                                        | 10    | CDKN1B,RIBC2,EPB41L3,PHGDH,CLDN1,AREG,TGM2,CSF1,JAG1,FST                                                                                                                |
| Mammary tumorigenesis                                                   | 8     | CDKN1B,EREG,PTGES,AREG,TGFA,S100A4,CSF1,VEGFA                                                                                                                           |
| Invasive cancer                                                         | 7     | PTGES,NLRP2,CSF1,TIMP4,FGF13,MYBL2,VEGFA                                                                                                                                |
| Vascular inflammations                                                  | 7     | DDIT4,ABCA1,F2RL3,F2RL1,EDNRA,TNFRSF1A,VEGFA                                                                                                                            |
| Angiogenic switch                                                       | 6     | F2RL1,EDNRA,IGFBP4,FGF13,EPAS1,VEGFA                                                                                                                                    |
| Advanced breast cancer                                                  | 6     | CYP2B6,JAG1,PLAT,SMAD3,CDK6,VEGFA                                                                                                                                       |
| Inflammatory breast carcinoma                                           | 6     | KRT81,IFITM1,AREG,TGFA,CSF1,VEGFA                                                                                                                                       |
| Breast diseases                                                         | 5     | SEMA3C,PTGES,TGFA,FST,VEGFA                                                                                                                                             |
| Early-stage breast carcinoma                                            | 5     | CDKN1B,EREG,S100A4,JAG1,VEGFA                                                                                                                                           |
| Inflammation                                                            | 4     | PTGES,F2RL1,TGFA,VEGFA                                                                                                                                                  |
| Metastatic human epidermal growth factor 2 positive carcinoma of breast | 3     | CDKN1B,AREG,VEGFA                                                                                                                                                       |
| Node-negative breast cancer                                             | 3     | CDKN1B,JAG1,VEGFA                                                                                                                                                       |
| Mammary neoplasms, human                                                | 1     | CSF1                                                                                                                                                                    |
| Metastatic ductal breast carcinoma                                      | 1     | VEGFA                                                                                                                                                                   |

Table SVIII. Diseases involving downregulated genes following complement factor H downregulation, based on the DAVID database results.

| Disease name   | Count | Genes                                                                                                                                                                                                                                                                                                    |
|----------------|-------|----------------------------------------------------------------------------------------------------------------------------------------------------------------------------------------------------------------------------------------------------------------------------------------------------------|
| Cardiovascular | 40    | SLC44A5, MOXD1, NNMT, PDE1C, CCDC68, FRMPD4, SATB1, CXCR4, PTPN22, FGF5, RGS4, RIMS1, GJA1, EPB41L4A, SRPX2, ADAMTS1, COBLL1, BTBD3, MAEL, NLRP3, TBC1D22B, ADAMTS6, CYP2J2, CCBE1, EDN1, CXADR, NEGR1, ATP8B1, MGC12916, SNCAIP, CORO2B, GPR137C, GULP1, FIG4, UBLCP1, LOX, ZNF716, VEPH1, KCNQ3, RBMS3 |
| Chemdependency | 36    | SLC44A5, PDE1C, SATB1, PLD5, PTPN22, FGF5, RGS4, RIMS1, EPB41L4A, UBL3, COBLL1, MYO6, MAEL, AOX1, GABRE, SAMD12, MYH10, TBC1D22B, ADAMTS6, CYP2J2, CCBE1, DTNA, CXADR, NEGR1, DAPK1, ZNF804A, SNCAIP, CORO2B, CPPED1, FAM210B, LOX, HKDC1, VEPH1, ZNF438, KCNQ3, RBMS3                                   |
| Immune         | 32    | HERPUD2, NNMT, PDE1C, SATB1, PLD5, CXCR4, PTPN22, CTSV, FAM117B, RGS4, RIMS1, UBL3, DMBT1, TTPA, POLI, NLRP3, PMAIP1, AOX1, LOC728755, LINC01446, CYP2J2, EGR1, CCBE1, ARG2, EDN1, NEGR1, ATP8B1, PDCD1LG2, FIG4, UBLCP1, LOX, RAB38                                                                     |
| Neurological   | 29    | SLC44A5, KHDRBS3, NNMT, FRMPD4, CRYZ, RGS4, RIMS1, GJA1, DMBT1, TTPA, COBLL1, BTBD3, SH3BGRL2, GABRE, MYH10, EDN1, NEGR1, DAPK1, PDCD1LG2, SNCAIP, CORO2B, GCFC2, LOX, HKDC1, ABI1, C18ORF54, ZNF438, KCNQ3, RBMS3                                                                                       |
